# Supplementary material
Source: MDPI journal article supplement (https://www.mdpi.com/2073-4352/10/12/1133)

## Supporting Information

### "Free of base" sulfa-Michael addition for novel o-carboranyl-DL-cysteine synthesis.

#### Materials and Methods

[1-S-1,2-C<sub>2</sub>B<sub>10</sub>H<sub>11</sub>](Me<sub>3</sub>NH) (**7**) was prepared according to the literature procedure [1]. Methyl 2-acetamidoacrylate (Sigma Aldrich Chemie GmbH) was used without purification. <sup>2</sup>H<sub>2</sub>O was received from Carl Roth GmbH. Reactions proceeding were monitored via thin-layer chromatograms (Merck F254 silica gel on aluminum plates). Boron compounds were visualized with PdCl<sub>2</sub> stain solution, which upon heating gave dark brown spots. Purifications were carried out using column chromatography with Silica gel 60 0.060-0.200 mm (Acros Organics). <sup>1</sup>H, <sup>13</sup>C and <sup>11</sup>B NMR spectra were recorded at 400.13, 100.61 and 128.38 MHz, respectively, on a BRUKER-Avance-400 spectrometer. Tetramethylsilane and BF<sub>3</sub>·Et<sub>2</sub>O were used as standards for <sup>1</sup>H, <sup>13</sup>C NMR, and <sup>11</sup>B NMR respectively. All chemical shifts are reported in ppm (δ) relative to external standards. IR spectra were recorded on IR Prestige-21 (SHIMADZU) instrument. High resolution mass spectra (HRMS) were measured on a Bruker micrOTOF II instrument using electrospray ionization (ESI), mass range from *m/z* 50 to *m/z* 3000; external or internal calibration was done with ESI Tuning Mix, Agilent.

#### *Synthesis of 1-CH<sub>3</sub>O(O)C(CH<sub>3</sub>(O)CHN)CHCH<sub>2</sub>S-1,2-C<sub>2</sub>B<sub>10</sub>H<sub>11</sub> (**8**)*

To a solution of **7** (0.5 g, 2.1 mmol) in toluene (30 ml) methyl 2-acetamidoacrylate (0.3 g, 2.1 mmol) and H<sub>2</sub>O (30 ml) were added, resulted system was vigorously stirred under reflux for 24 hours. Then the mixture was cooled to r.t., toluene layer was separated, washed with H<sub>2</sub>O (2×20), dried over Na<sub>2</sub>SO<sub>4</sub> and evaporated. Product was purified by silica gel column chromatography using Et<sub>2</sub>O as eluent and vacuum dried to give light yellow solid. Yield: 0.46 g (68%). <sup>1</sup>H NMR (Chloroform-*d*) δ = 6.29 (d, *J* = 7.7 Hz, 1H, NH), 4.89 (td, *J* = 7.2, 4.5 Hz, 1H, α-CH), 3.99 (broad s, 1H, carb-CH), 3.82 (s, 3H, COOCH<sub>3</sub>), 3.51 (dd, *J* = 13.4, 4.6 Hz, 1H, CH<sub>2</sub>CH), 3.18 (dd, *J* = 13.4, 6.9 Hz, 1H, CH<sub>2</sub>CH), 2.06 (s, 3H, NHCOCH<sub>3</sub>), 3.0-1.5 (broad, 10H, BH); <sup>11</sup>B NMR (Chloroform-*d*) δ = -1.5 (d, *J* = 150 Hz, 1B), -4.7 (d, *J* = 146 Hz, 1B), -8.8 (d, *J* = 154 Hz, 4B), -12.2 (d, *J* = 162 Hz, 4B); <sup>13</sup>C NMR (Chloroform-*d*) δ = 170.21, 170.17 (CO), 73.9, 67.9 (C-carb), 53.2 (OCH<sub>3</sub>), 51.2 (α-CH), 39.4 (CH<sub>2</sub>CH), 23.1 (COCH<sub>3</sub>). ESI-MS, *m/z*, C<sub>8</sub>H<sub>21</sub>B<sub>10</sub>NO<sub>3</sub>S calcd. 320.2322, found 320.2322 ([M+H]<sup>+</sup>). IR-FT (ν, cm<sup>-1</sup>): 3371(NH), 3060 (CH-carb); 2948, 2926, 2852 (broad CH); 2607, 2584, 2557 (BH); 1736, 16177 (CO).

- 
1. Stogniy, M.Yu.; Erokhina, S.A.; Druzina A.A.; Sivaev I. B.; Bregadze, V.I. Synthesis of novel carboranyl azides and "click" reactions thereof. J. Organomet. Chem. 2019, 904, 121007. <https://doi.org/10.1016/j.jorganchem.2019.121007>

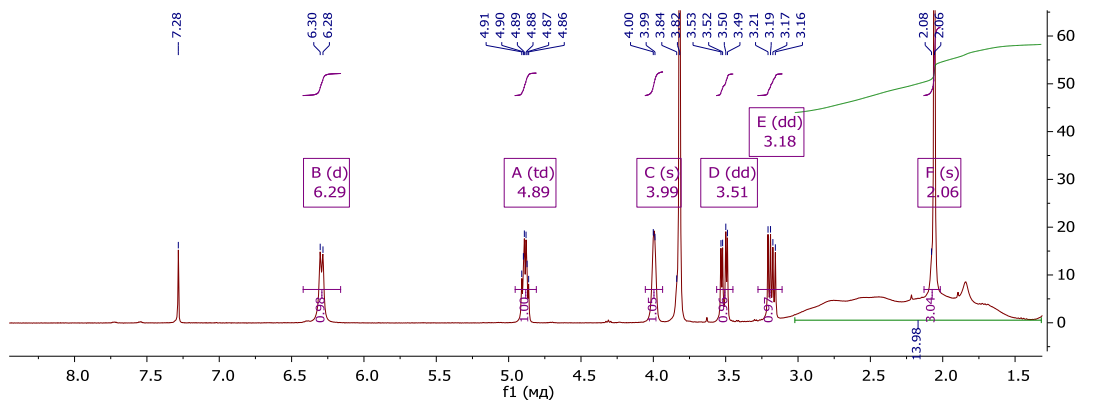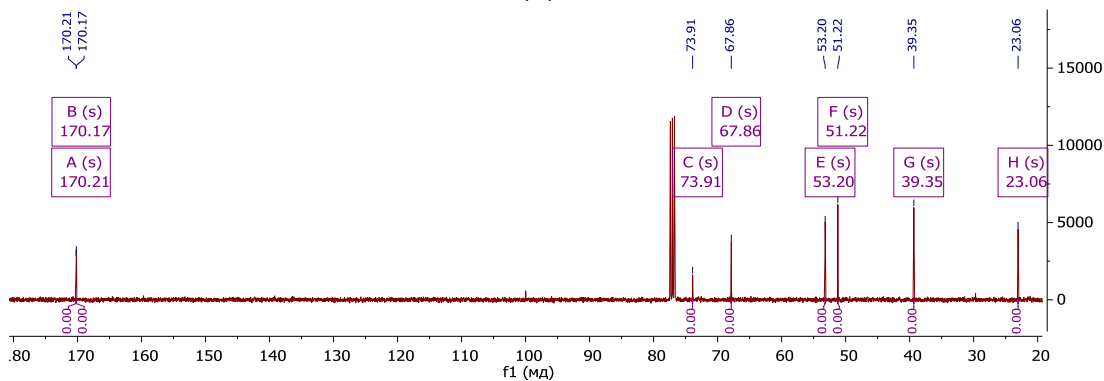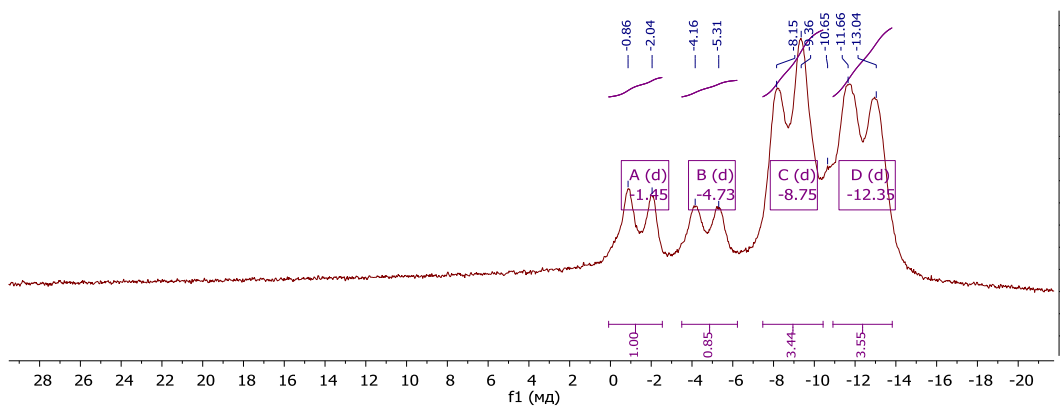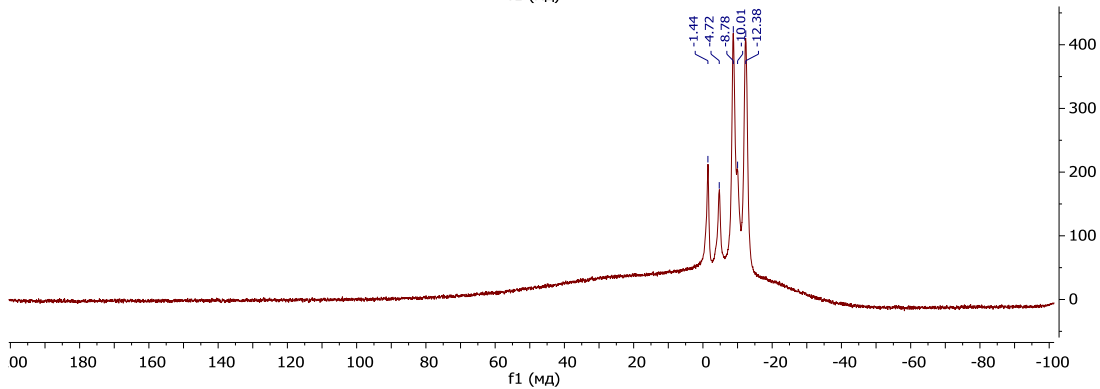

Method tune\_low\_1550.m  
Sample Name /CHIZ GB-C1  
Comment CH3CN 100 %, dil. 200, calibrant added

Operator BDAL@DE  
Instrument maXis 43

#### Acquisition Parameter

|             |            |                       |           |                  |           |
|-------------|------------|-----------------------|-----------|------------------|-----------|
| Source Type | ESI        | Ion Polarity          | Positive  | Set Nebulizer    | 0.4 Bar   |
| Focus       | Not active | Set Capillary         | 4500 V    | Set Dry Heater   | 180 °C    |
| Scan Begin  | 50 m/z     | Set End Plate Offset  | -500 V    | Set Dry Gas      | 4.0 l/min |
| Scan End    | 1550 m/z   | Set Collision Cell RF | 300.0 Vpp | Set Divert Valve | Source    |

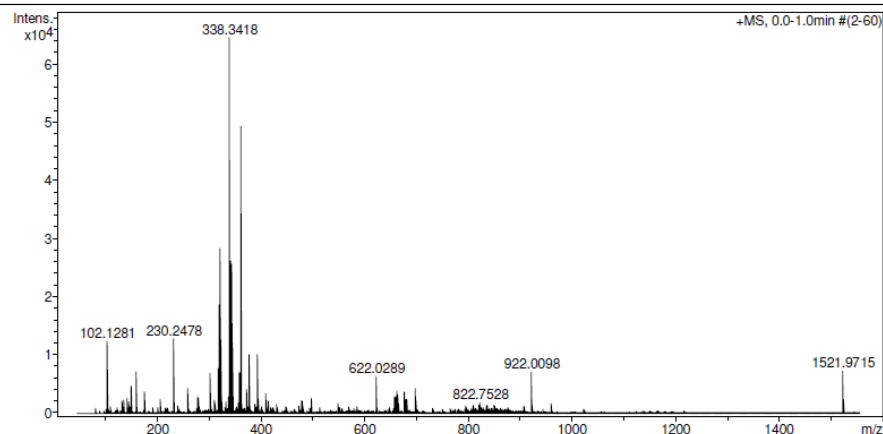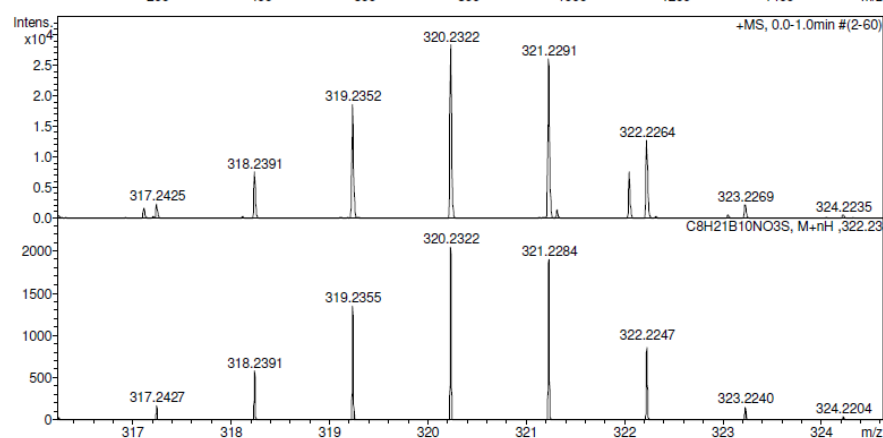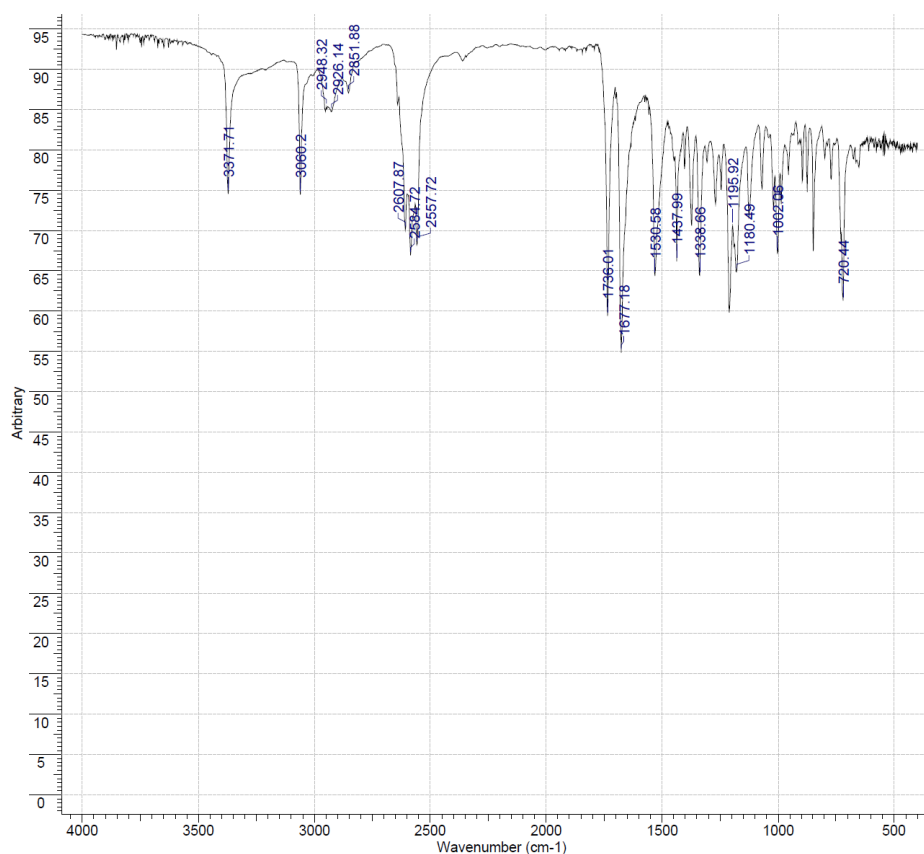

## Crystallographic data:

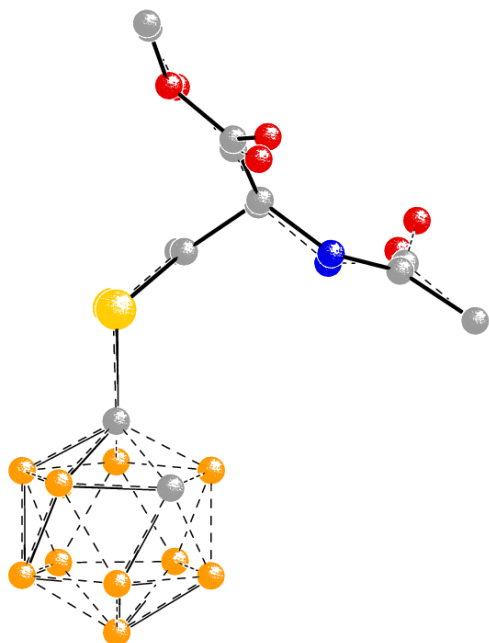

Crystals of **8** ( $\text{C}_8\text{H}_{21}\text{B}_{10}\text{NO}_3\text{S}$ ,  $M = 319.42$ ) are triclinic, space group P-1, at 120K:  $a = 7.6513(5)$ ,  $b = 10.5669(7)$ ,  $c = 11.5392(7)$ ,  $\alpha = 68.378(1)^\circ$ ,  $\beta = 85.686(1)^\circ$ ,  $\gamma = 72.663(1)^\circ$ ,  $V = 827.27(9) \text{ \AA}^3$ ,  $Z = 2$  ( $Z' = 1$ ),  $d_{\text{calc}} = 1.282 \text{ g}\cdot\text{cm}^{-3}$ ,  $F(000) = 332$ . Intensities of 11058 reflections were measured with a Bruker SMART APEX 2 Duo CCD diffractometer [ $\lambda(\text{MoK}\alpha) = 0.71072 \text{ \AA}$ ,  $\omega$ -scans,  $2\theta < 60^\circ$ ] and 4824 independent reflections [ $R_{\text{int}} = 0.0324$ ] were used in further refinement. The structure was solved by the direct method and refined by the full-matrix least-squares technique against  $F^2$  in the anisotropic-isotropic approximation. The hydrogen atoms were found in the difference Fourier synthesis and refined in the isotropic approximation within the riding model. For **8**, the refinement converged to  $wR_2 = 0.1167$  and  $\text{GOF} = 0.781$  for all independent reflections ( $R_1 = 0.0371$  was calculated for 3661 observed reflections with  $I > 2\sigma(I)$ ). All calculations were performed using SHELX2018 [2]. The CCDC 2034871 contains the supplementary crystallographic data for **8**. These data can be obtained free of charge via <http://www.ccdc.cam.ac.uk/conts/retrieving.html> (or from the CCDC, 12 Union Road, Cambridge, CB21EZ, UK; or [deposit@ccdc.cam.ac.uk](mailto:deposit@ccdc.cam.ac.uk)).

**Computational details:** All calculations were done in the Gaussian09 program (rev. D01) [3]. The geometry optimization procedures were performed using standard criteria on displacements and forces. The DFT optimization were performed using the PBE0 functional [4] and the 6-311++G(d,p) basis set (ultrafine integration grids were used). The non-specific solvation was modelled using the self-consistent reaction field approach (PCM model,  $\epsilon=72$ ). The influence of specific solvation on the geometry of **8** was

- 
- Sheldrick G. M. Crystal structure refinement with SHELXL. *Acta Cryst.* **2015**, C71, 3-8.
  - Gaussian 09, Revision D.01, M. J. Frisch, G. W. Trucks, H. B. Schlegel, G. E. Scuseria, M. A. Robb, J. R. Cheeseman, G. Scalmani, V. Barone, G. A. Petersson, H. Nakatsuji, X. Li, M. Caricato, A. Marenich, J. Bloino, B. G. Janesko, R. Gomperts, B. Mennucci, H. P. Hratchian, J. V. Ortiz, A. F. Izmaylov, J. L. Sonnenberg, D. Williams-Young, F. Ding, F. Lipparini, F. Egidi, J. Goings, B. Peng, A. Petrone, T. Henderson, D. Ranasinghe, V. G. Zakrzewski, J. Gao, N. Rega, G. Zheng, W. Liang, M. Hada, M. Ehara, K. Toyota, R. Fukuda, J. Hasegawa, M. Ishida, T. Nakajima, Y. Honda, O. Kitao, H. Nakai, T. Vreven, K. Throssell, J. A. Montgomery, Jr., J. E. Peralta, F. Ogliaro, M. Bearpark, J. J. Heyd, E. Brothers, K. N. Kudin, V. N. Staroverov, T. Keith, R. Kobayashi, J. Normand, K. Raghavachari, A. Rendell, J. C. Burant, S. S. Iyengar, J. Tomasi, M. Cossi, J. M. Millam, M. Klene, C. Adamo, R. Cammi, J. W. Ochterski, R. L. Martin, K. Morokuma, O. Farkas, J. B. Foresman, and D. J. Fox, Gaussian, Inc., Wallingford CT, **2016**.
  - (a) Perdew J.; Ernzerhof M.; Burke K. *J. Chem. Phys.* **1996**, *105*, 9982-9985.  
(b) Carlo A.; Barone V. *J. Chem. Phys.* **1999**, *110*, 6158-6170.

accounted for by the optimization of a central molecule in clusters; two models were used: 1) the trimer of molecules from crystal of **8** with fixed coordinates and normalized X-H bond lengths for lateral molecules and 2) the shell of molecules from crystal of **8** with fixed coordinates and normalized X-H bond lengths. The QTAIM surface integrals for the trimer were calculated using the AIMAll program [5]. The shell in the second model was generated using the criteria of at least one geometrical contact (within the sum of van der Waals radii plus 5 Å) between surrounding molecules and the central molecule. The shell was described by the ONIOM approach (PBE0/6-311++G(d,p):PBE0/3-21G) and only the internal layer (the central molecule) was optimized. The Hessian calculations for all optimized structures revealed their correspondence to energy minimums.

#### **Synthesis of 1-HOOC(NH<sub>2</sub>)CHCH<sub>2</sub>S-1,2-C<sub>2</sub>B<sub>10</sub>H<sub>11</sub>×HCl (**9**)**

Water (2 ml) and concentrated HCl (10 ml) were added to a solution of **8** (0.1 g, 0.3 mmol) in glacial acetic acid (10 ml). The resulted mixture was heated at 70°C for 40 h., cooled to r.t. and evaporated. The residue was suspended in 5 ml of water, formed solid was filtered, washed with water (2×5 ml) and vacuum dried to give **9**. Light yellow solid (0.093 mg, 70%). <sup>1</sup>H NMR (Methanol-*d*<sub>4</sub>) δ = 4.89 (s, 1H, carb-CH), 4.09 (m, 1H, α-CH), 3.64 (m, 1H, CH<sub>2</sub>CH), 3.43 (m, 1H, CH<sub>2</sub>CH), 3.0-1.5 (broad, 10H, BH); <sup>11</sup>B NMR (Methanol-*d*<sub>4</sub>) δ = -1.8 (d, *J* = 151 Hz, 1B), -5.1 (d, *J* = 148 Hz, 1B), -9.2 (d, *J* = 148 Hz, 4B), -12.3 (d, *J* = 172 Hz, 4B). <sup>13</sup>C NMR (Methanol-*d*<sub>4</sub>) δ 172.0 (COOH), 74.8, 68.4 (C-carb), 51.60 (α-CH), 38.3 (CH<sub>2</sub>CH). ESI-MS, *m/z*, C<sub>5</sub>H<sub>17</sub>B<sub>10</sub>NO<sub>2</sub>S calcd. 264.2059, found 264.2061. IR-FT (ν, cm<sup>-1</sup>): 3399 (broad NH<sup>+</sup>), 3058 (CH - carb); 2923, 2854 (CH); 2580 (broad BH), 1728 (CO).

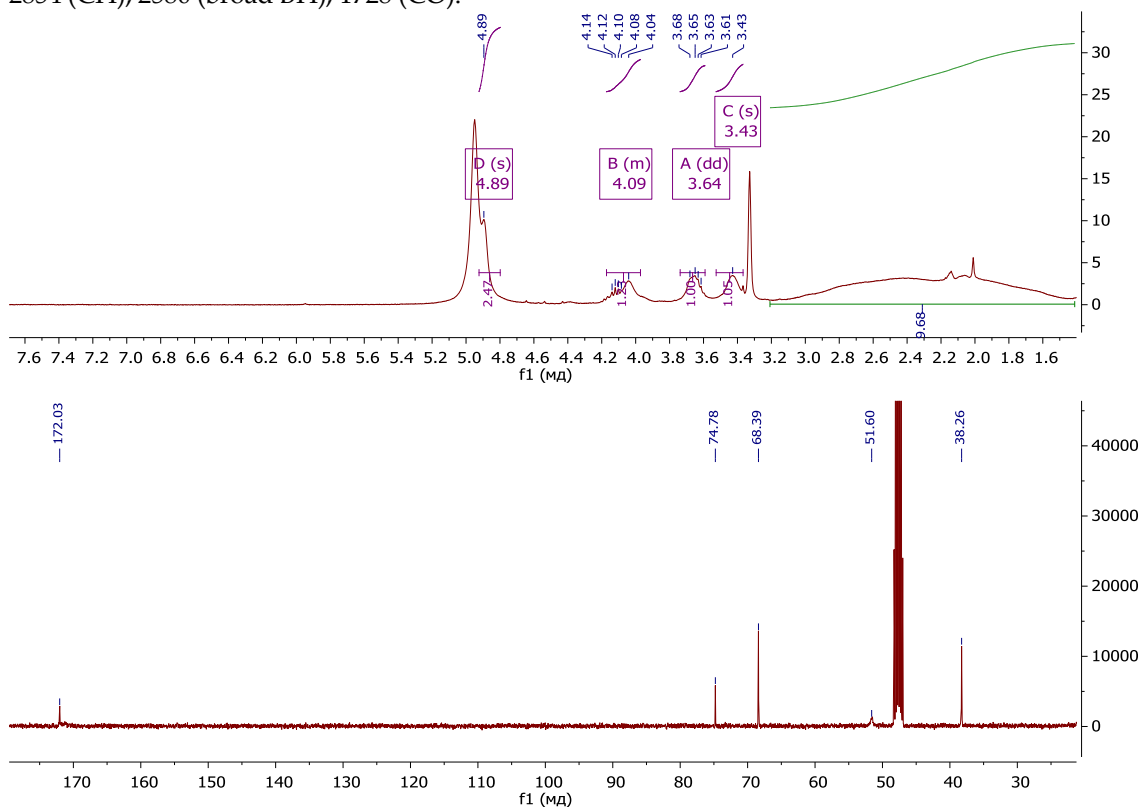

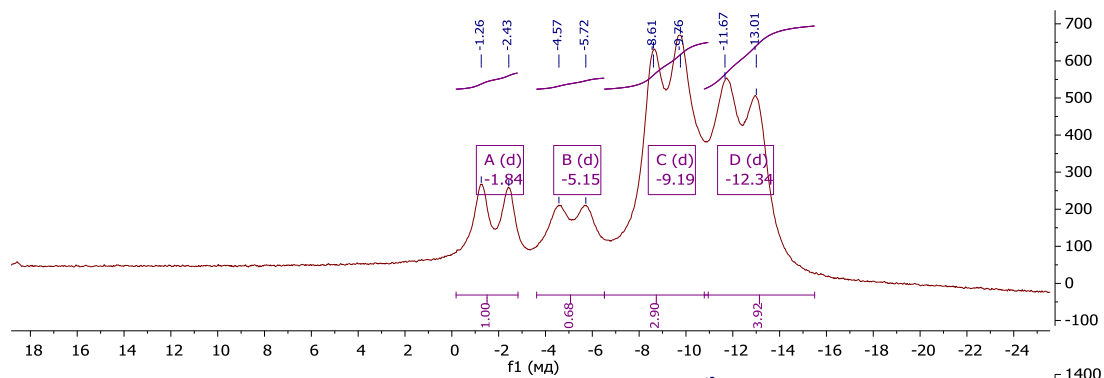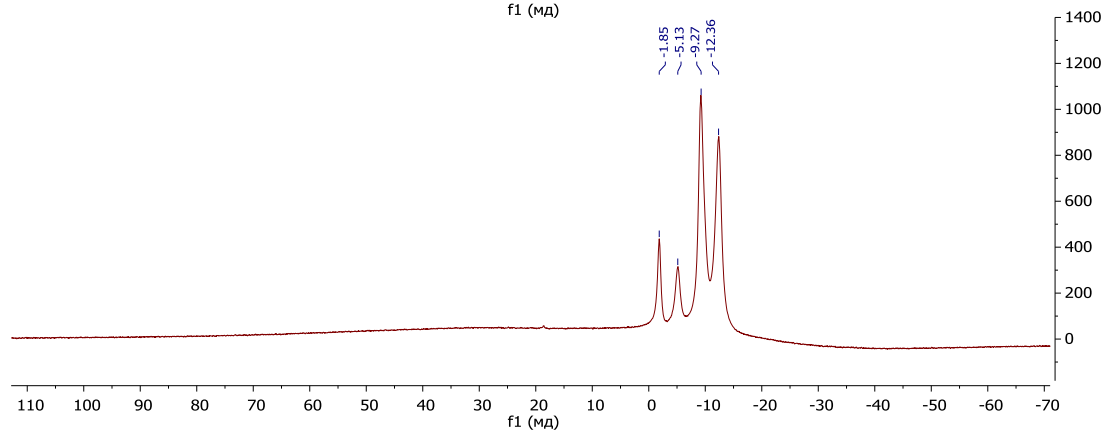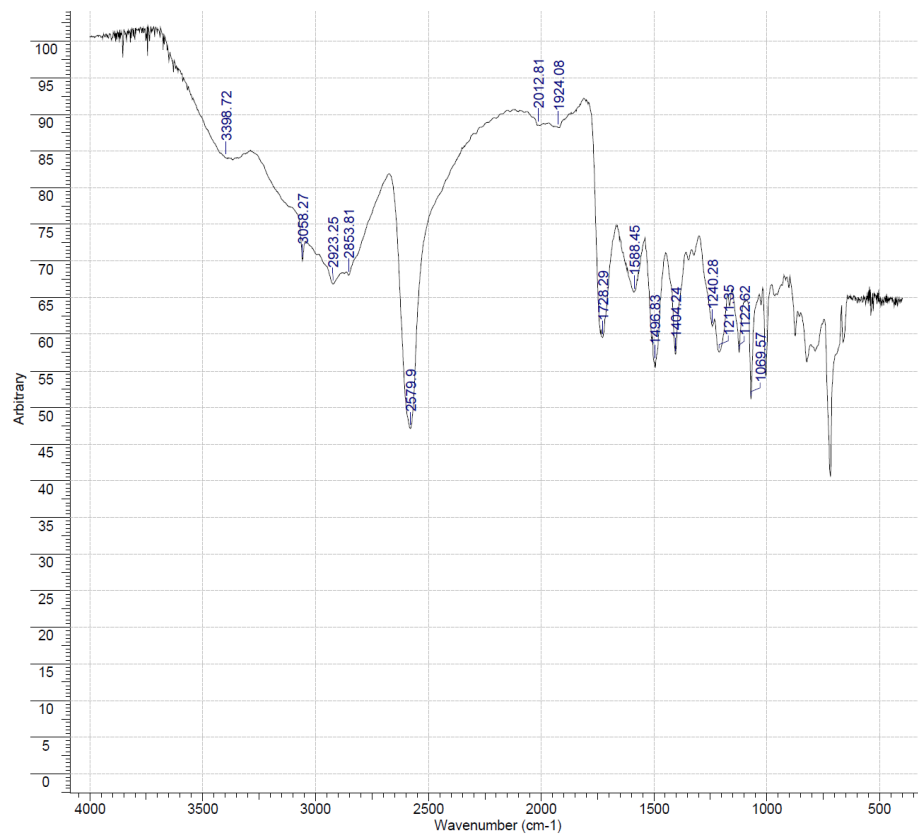

Method tune\_low\_1550.m  
 Sample Name /CHIZ GB-C3  
 Comment CH3CN 100 %, dil. 20, calibrant added

Operator BDAL@DE  
 Instrument maXis 43

#### Acquisition Parameter

|             |            |                       |           |                  |           |
|-------------|------------|-----------------------|-----------|------------------|-----------|
| Source Type | ESI        | Ion Polarity          | Positive  | Set Nebulizer    | 0.4 Bar   |
| Focus       | Not active | Set Capillary         | 4500 V    | Set Dry Heater   | 180 °C    |
| Scan Begin  | 50 m/z     | Set End Plate Offset  | -500 V    | Set Dry Gas      | 4.0 l/min |
| Scan End    | 1550 m/z   | Set Collision Cell RF | 300.0 Vpp | Set Divert Valve | Source    |

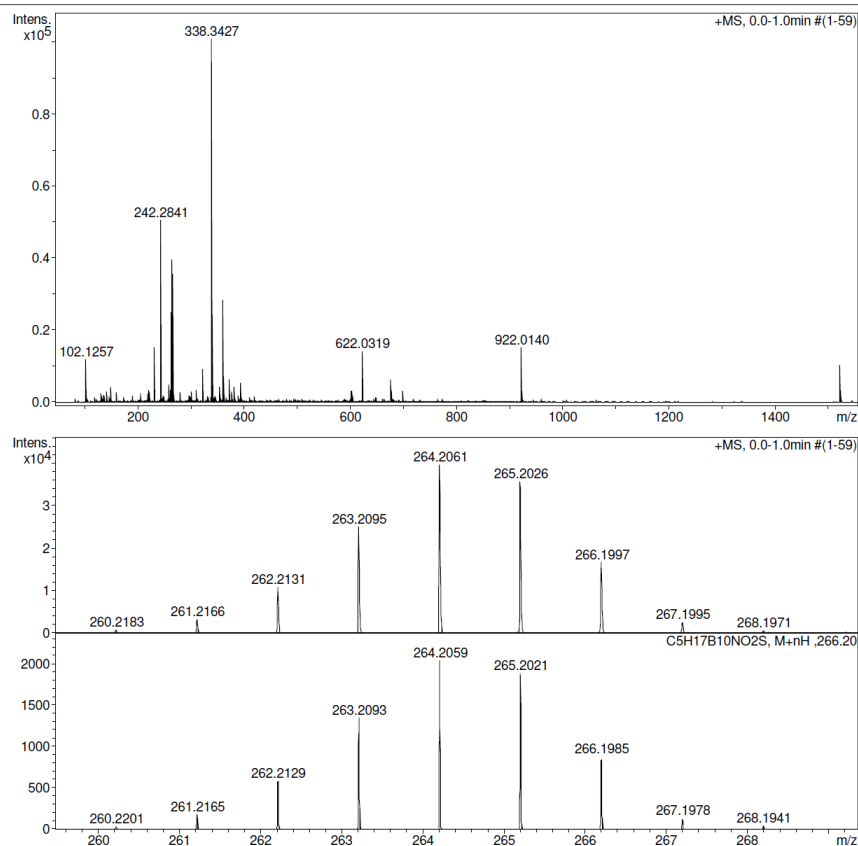

#### Synthesis of 1-CH<sub>3</sub>O(O)C(CH<sub>3</sub>(O)CHN)CDCH<sub>2</sub>S-1,2-C<sub>2</sub>B<sub>10</sub>H<sub>11</sub> (10)

Under argon atmosphere methyl 2-acetamidoacrylate (0.06 g, 0.4 mmol) and <sup>2</sup>H<sub>2</sub>O (5 ml) were added to a solution of **7** (0.1 g, 0.4 mmol) in toluene (15ml), resulted two-phase system was vigorously stirred under reflux for 30 hours. Purification was held in the same manner as for compound **8**. Light yellow solid (90 mg, 66%). <sup>1</sup>H NMR (Chloroform-*d*) δ = 6.31 (s, 1H, NH), 4.00 (broad s, 1H, CH-carb), 3.82 (s, 3H, COOCH<sub>3</sub>), 3.50 (d, *J* = 13.4 Hz, 1H, CH<sub>2</sub>CD), 3.17 (d, *J* = 13.4 Hz, 1H, CH<sub>2</sub>CD), 2.06 (s, 3H, NHCOCH<sub>3</sub>), 3.0-1.5 (broad, 10H, BH); <sup>11</sup>B NMR (Chloroform-*d*) δ = -1.5 (d, *J* = 151 Hz, 1B), -4.8 (d, *J* = 150 Hz, 1B), -8.9 (d, *J* = 151 Hz, 4B), -12.4 (d, *J* = 176 Hz, 4B); <sup>13</sup>C NMR (Chloroform-*d*) δ = 170.23, 170.17 (CO), 73.9, 67.9 (C-carb), 53.2 (OCH<sub>3</sub>), 51.0 (t, α-CD), 39.3 (CH<sub>2</sub>), 23.1 (COCH<sub>3</sub>). ESI-MS, *m/z*, C<sub>8</sub>H<sub>20</sub>DB<sub>10</sub>NO<sub>3</sub>S calcd. 321.2385, found 321.2399. IR-FT (ν, cm<sup>-1</sup>): 3370 (NH), 3061 (CH - carb); 2953 (CH); 2608, 2586, 2557 (BH), 1733, 1674 (CO).





Method tune\_low\_1550.m  
Sample Name /CHIZ GB-C2  
Comment CH3CN 100 %, dil. 200, calibrant added

Operator BDAL@DE  
Instrument maXis 43

#### Acquisition Parameter

|             |            |                       |           |                  |           |
|-------------|------------|-----------------------|-----------|------------------|-----------|
| Source Type | ESI        | Ion Polarity          | Positive  | Set Nebulizer    | 0.4 Bar   |
| Focus       | Not active | Set Capillary         | 4500 V    | Set Dry Heater   | 180 °C    |
| Scan Begin  | 50 m/z     | Set End Plate Offset  | -500 V    | Set Dry Gas      | 4.0 l/min |
| Scan End    | 1550 m/z   | Set Collision Cell RF | 300.0 Vpp | Set Divert Valve | Source    |

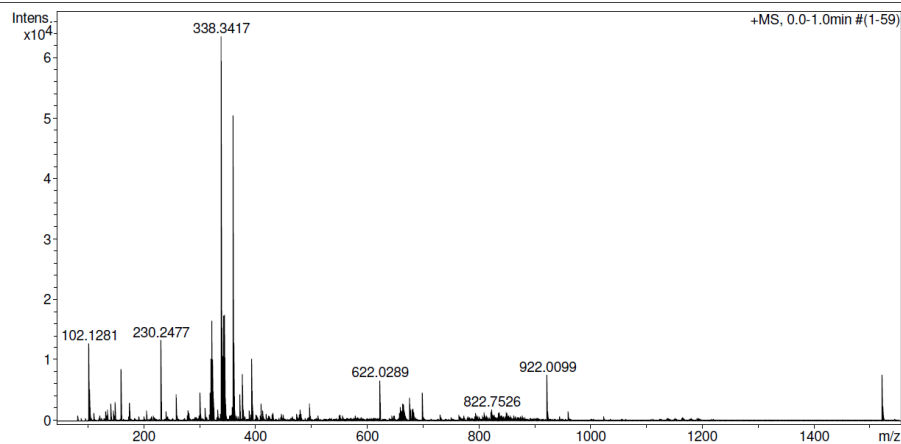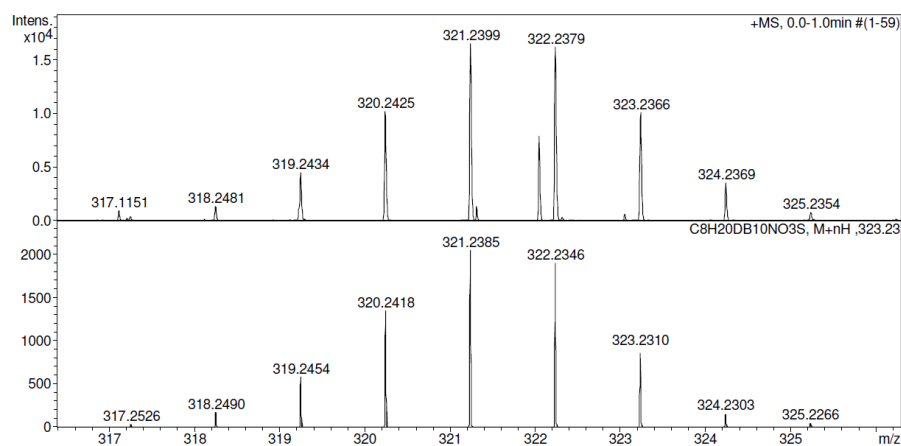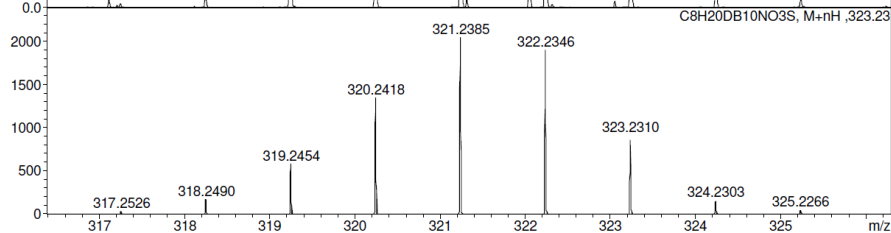

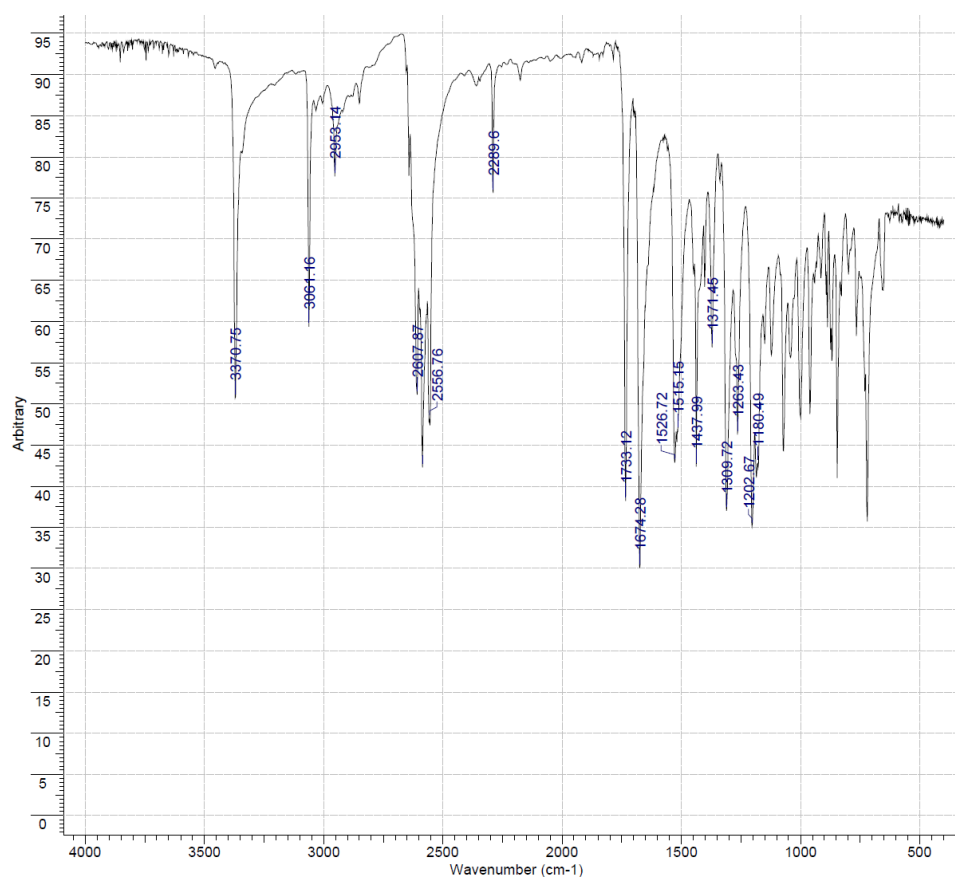

#### ***Synthesis of 1-HOOC(NH<sub>2</sub>)CDCH<sub>2</sub>S-1,2-C<sub>2</sub>B<sub>10</sub>H<sub>11</sub>×HCl (11)***

Water (2 ml) and concentrated HCl (5 ml) were added to a solution of **10** (0.05 g, 0.16 mmol) in glacial acetic acid (5 ml). The resulted mixture was heated at 70°C for 40 h., cooled to r.t. and evaporated. The residue was suspended in 5 ml of water, formed solid was filtered, washed with water (2 ml) and vacuum dried to yield **11**: 38 mg (81%). <sup>1</sup>H NMR (Methanol-*d*<sub>4</sub>) δ = 4.88 (broad s, 1H, CH-carb), 4.27 – 4.20 (α-CH, m, 0,1H), 3.64 (d, *J* = 13.9 Hz, 1H, CH<sub>2</sub>CD), 3.44 (d, *J* = 13.9 Hz, 1H, CH<sub>2</sub>CD), 3.0-1.5 (broad, 10H, BH). <sup>11</sup>B NMR (Methanol-*d*<sub>4</sub>) δ = -1.9 (d, *J* = 149 Hz, 1B), -4.9 (d, *J* = 140 Hz, 1B), -9.0 (d, *J* = 143 Hz, 4B), -12.3 (d, *J* = 175 Hz, 4B). <sup>13</sup>C NMR (Methanol-*d*<sub>4</sub>) δ = 168.0 (CO), 73.6 (C-carb), 68.4 (C-carb), 51.8 (α-C), 36.0 (CH<sub>2</sub>). ESI-MS, *m/z*, C<sub>5</sub>H<sub>17</sub>B<sub>10</sub>NO<sub>2</sub>S calcd. 265.2122, found 265.2127.

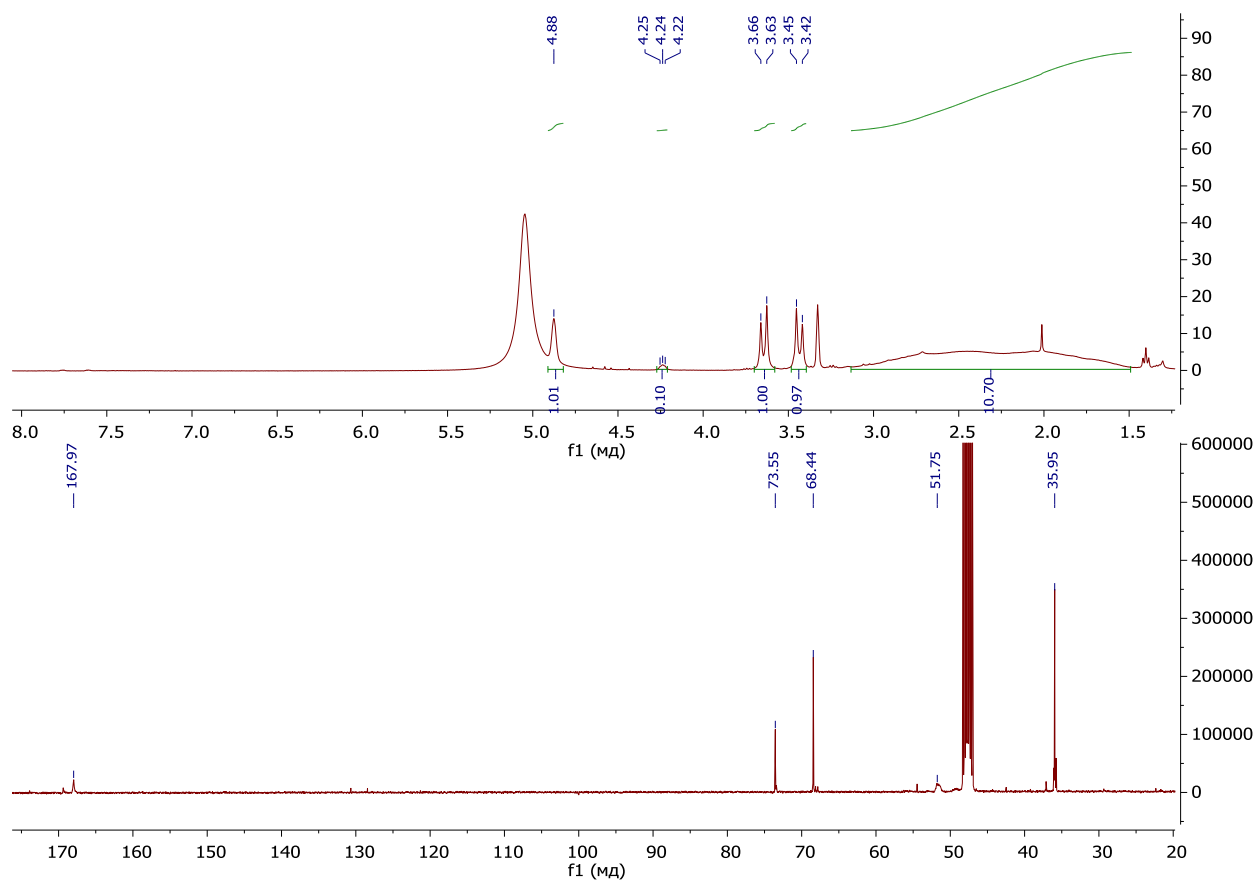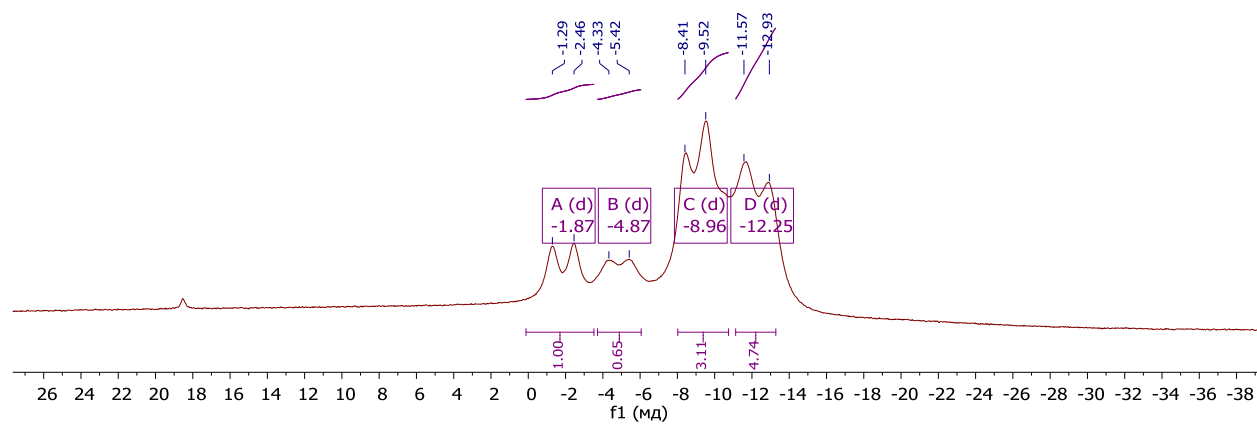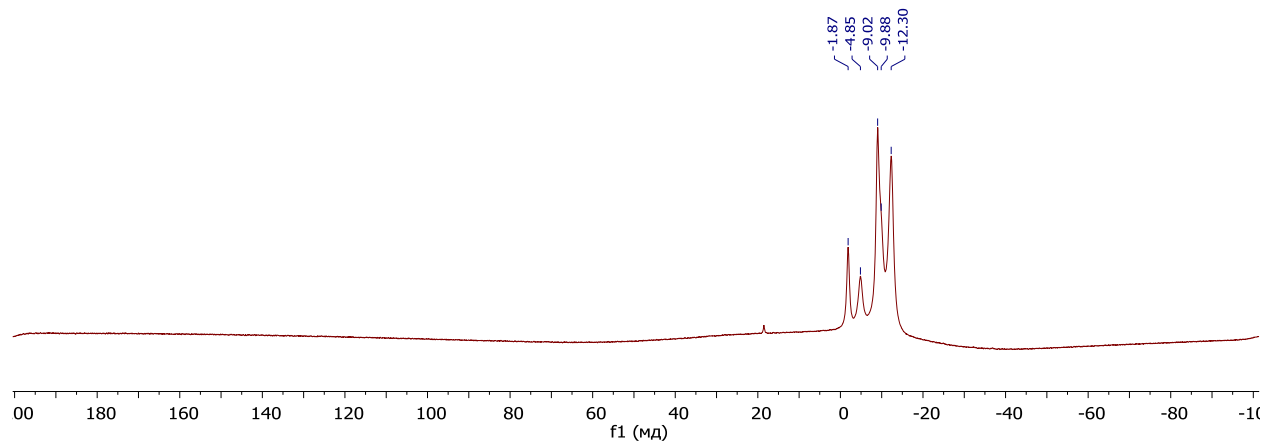

Method tune\_low\_1550.m  
 Sample Name /CHIZ GB-C5  
 Comment CH3CN 100 %, dil. 20, calibrant added

Operator BDAL@DE  
 Instrument maXis 43

#### Acquisition Parameter

|             |            |                       |           |                  |           |
|-------------|------------|-----------------------|-----------|------------------|-----------|
| Source Type | ESI        | Ion Polarity          | Positive  | Set Nebulizer    | 0.4 Bar   |
| Focus       | Not active | Set Capillary         | 4500 V    | Set Dry Heater   | 180 °C    |
| Scan Begin  | 50 m/z     | Set End Plate Offset  | -500 V    | Set Dry Gas      | 4.0 l/min |
| Scan End    | 1550 m/z   | Set Collision Cell RF | 300.0 Vpp | Set Divert Valve | Source    |

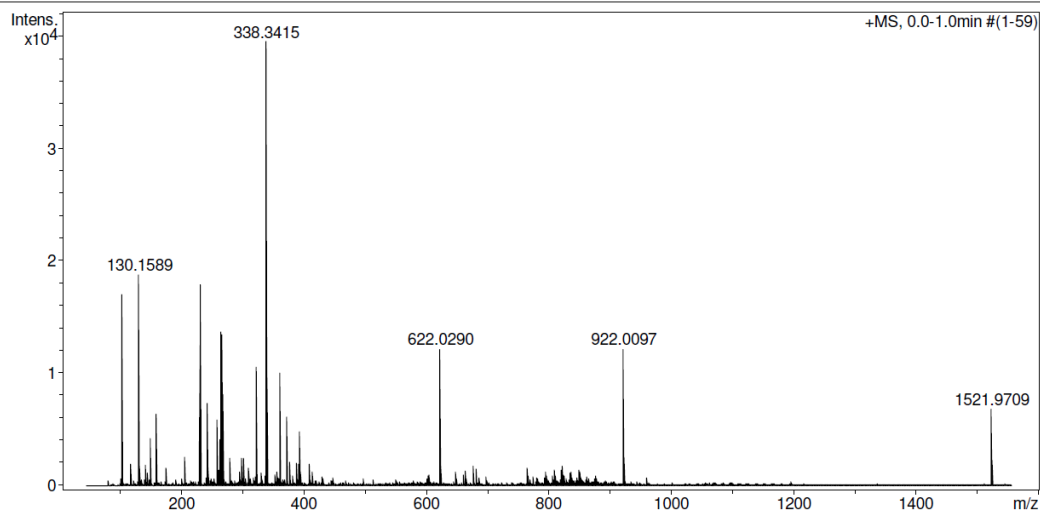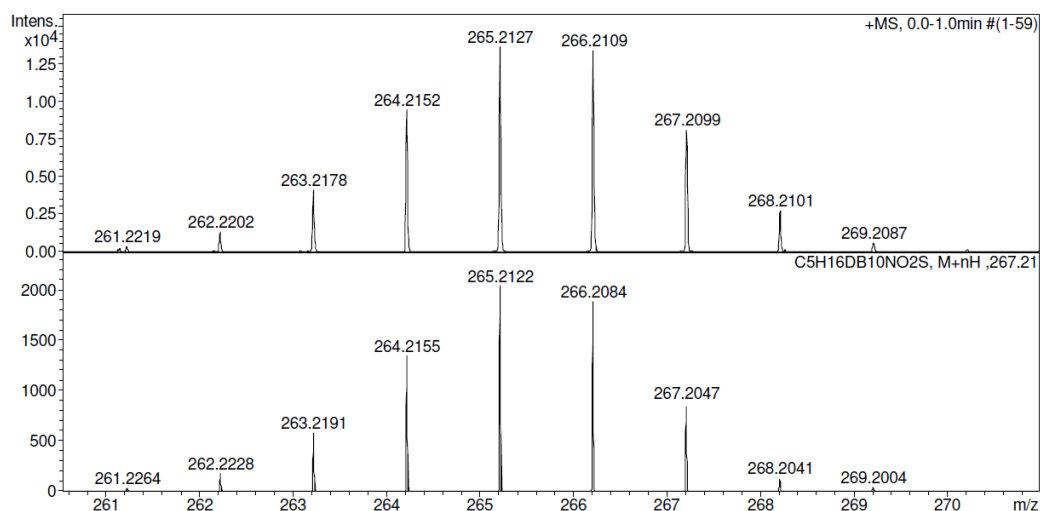

#### Synthesis of 1-CH<sub>3</sub>O(O)C(CH<sub>3</sub>(O)CHN)CHCH<sub>2</sub>S-2-D-1,2-C<sub>2</sub>B<sub>10</sub>H<sub>10</sub> (12)

Under argon atmosphere methyl 2-acetamidoacrylate (0.06 g, 0.4 mmol), <sup>2</sup>H<sub>2</sub>O (5 ml) and anhydrous K<sub>2</sub>CO<sub>3</sub> (0.055 g, 0.4 mmol) were added to a solution of 7 (0.1 g, 0.4 mmol) in toluene (15ml), resulted system was vigorously stirred under reflux for 10 hours. The purification was held in the same manner as for compound 8. Light yellow solid (13 mg, 10%). <sup>1</sup>H NMR (Chloroform-d) δ = 6.20 (d, J = 7.7 Hz, 1H, NH), 4.90 (td, J = 7.2, 4.7 Hz, 1H, α-CH), 4.00 (undetectable, s, 0H, carb-CD), 3.83 (s, 3H, COOCH<sub>3</sub>), 3.53 (dd, J = 13.4, 4.7 Hz, 1H, CH<sub>2</sub>CH), 3.19 (dd, J = 13.4, 6.9 Hz, 1H, CH<sub>2</sub>CH), 2.07 (s, 3H, NHCOCH<sub>3</sub>), 3.0-1.5 (broad, 10H, BH); <sup>11</sup>B NMR (Chloroform-d) δ = -1.5 (d, J = 152 Hz, 1B), -4.8 (d, J = 147 Hz, 1B), -8.9 (d, J = 152 Hz, 4B), -12.5 (d, J = 173 Hz, 4B); <sup>13</sup>C NMR (Chloroform-d) δ = 170.16, 170.14 (CO), 73.8 (CH-carb), 68.5 – 66.8 (t, CD-carb), 53.2 (OCH<sub>3</sub>), 51.2 (α-CH), 39.4 (CH<sub>2</sub>), 23.1 (COCH<sub>3</sub>). ESI-MS, m/z, C<sub>8</sub>H<sub>20</sub>DB<sub>10</sub>NO<sub>3</sub>S calcd. 321.2385, found 321.2384. IR-FT (ν, cm<sup>-1</sup>): 3372(NH), 2923, 2851 (CH); 2607, 2584, 2557 (BH); 2289 (CD-carb); 1736, 1677 (CO).

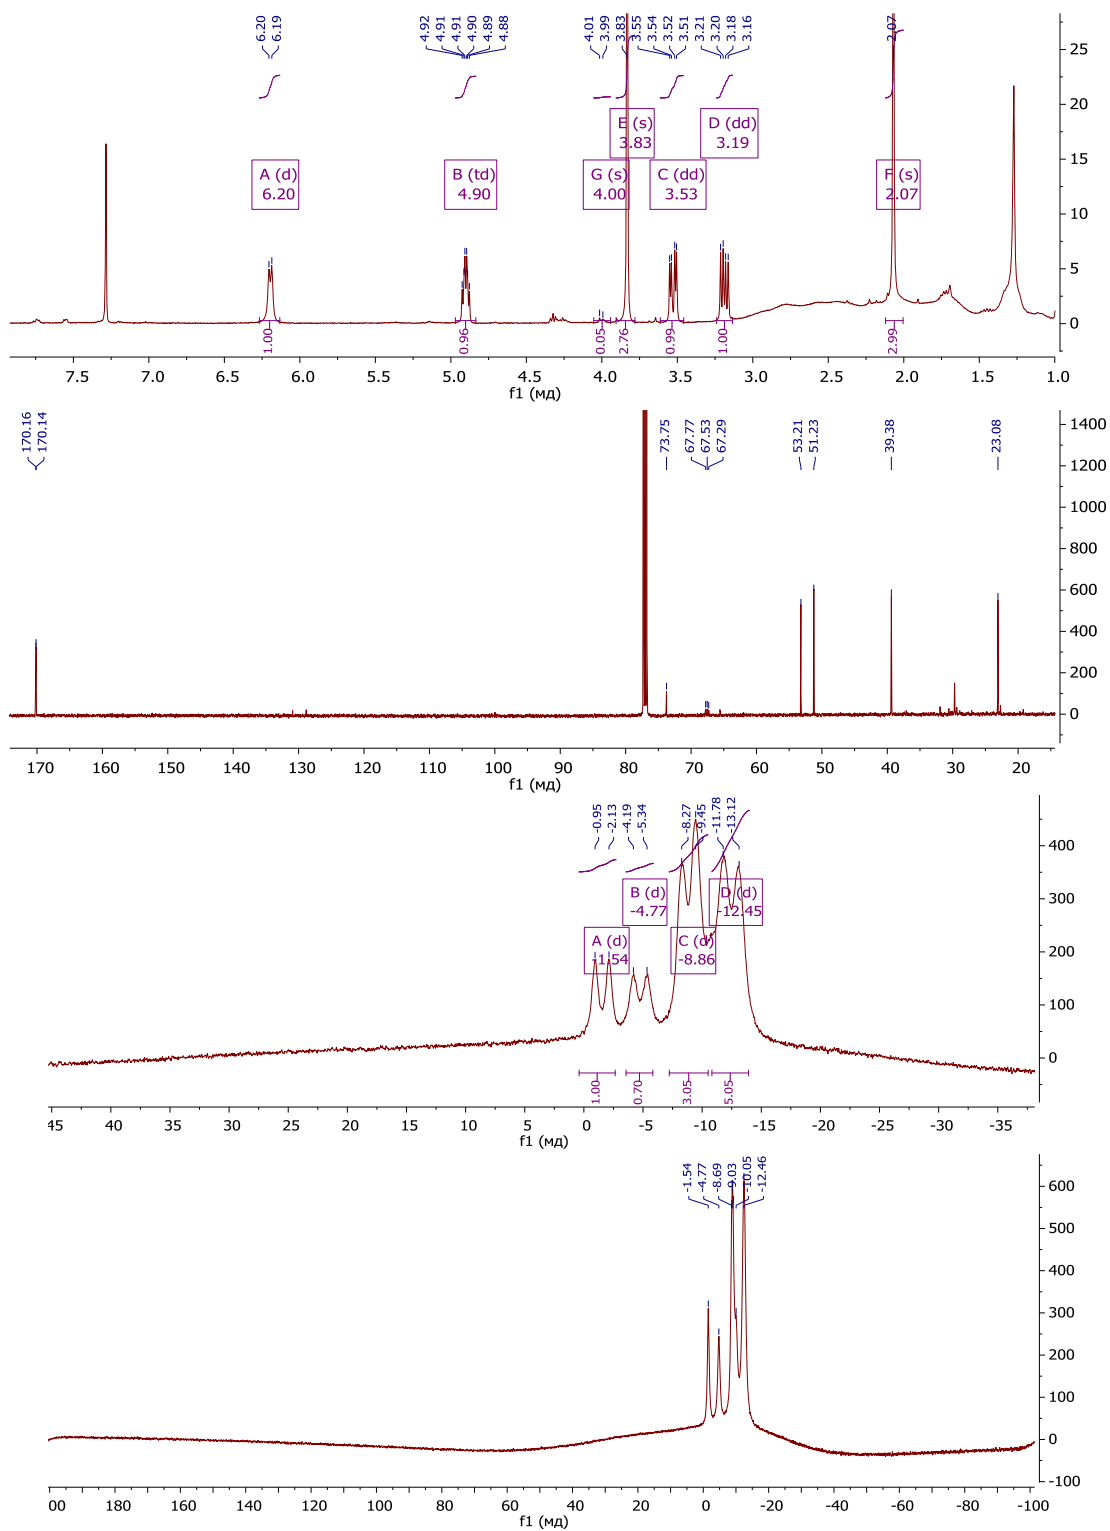

Method tune\_low\_1550.m  
Sample Name /CHIZ GB-C4  
Comment CH3CN 100 %, dil. 200, calibrant added

Operator BDAL@DE  
Instrument maXis 43

#### Acquisition Parameter

|             |            |                       |           |                  |           |
|-------------|------------|-----------------------|-----------|------------------|-----------|
| Source Type | ESI        | Ion Polarity          | Positive  | Set Nebulizer    | 0.4 Bar   |
| Focus       | Not active | Set Capillary         | 4500 V    | Set Dry Heater   | 180 °C    |
| Scan Begin  | 50 m/z     | Set End Plate Offset  | -500 V    | Set Dry Gas      | 4.0 l/min |
| Scan End    | 1550 m/z   | Set Collision Cell RF | 300.0 Vpp | Set Divert Valve | Source    |

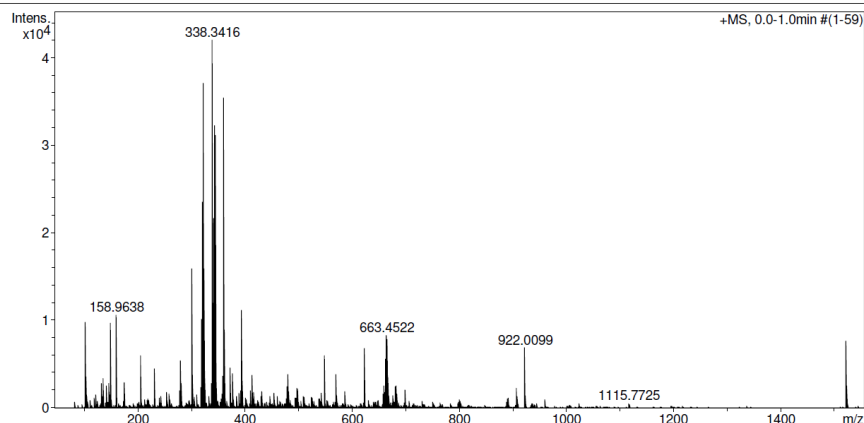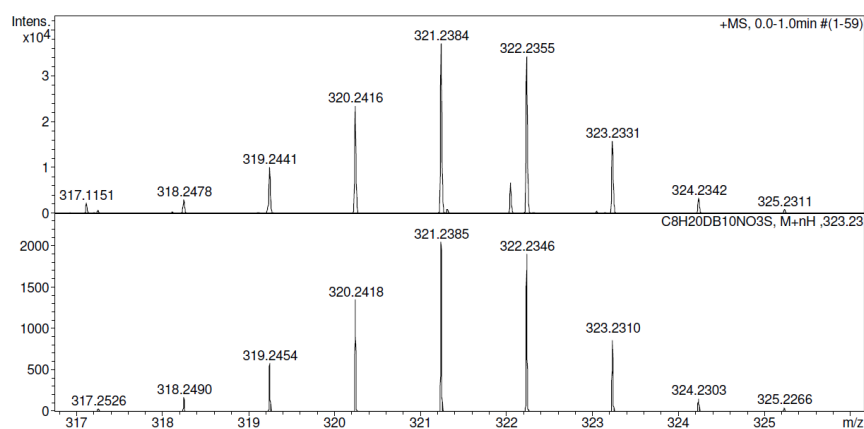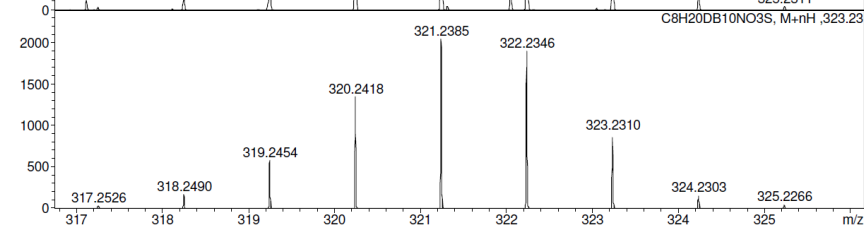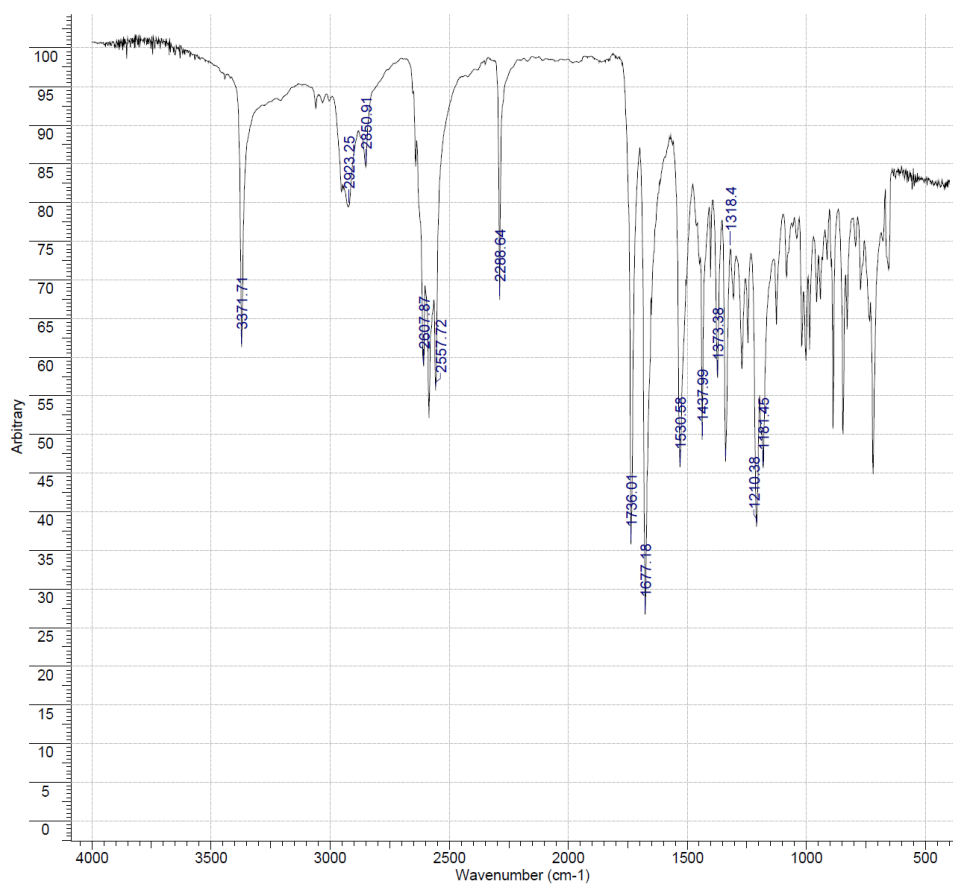

Supplement: s1 [file s1]
